# Supplementary material
Source: PubMed Central journal article supplement (PMC5777152)
Supplement: NIHMS930315-supplement-Supplementary_Online_Content.pdf [file NIHMS930315-supplement-Supplementary_Online_Content.pdf]

## Supplementary Online Content

Almeida DRP, Zhang L, Chin EK, et al. Comparison of retinal and choriocapillaris thicknesses following sitting and supine transition in healthy individuals and patients with age-related macular degeneration. *JAMA Ophthalmol*. Published online December 18, 2014. doi:10.1001/jamaophthalmol.2014.5168.

**eFigure.** Comparison Between Supine and Sitting

**eTable.** Retinal and Choroidal Baseline Optical Coherence Tomography Characteristics

This supplementary material has been provided by the authors to give readers additional information about their work.

**eFigure.** Comparison Between Supine and Sitting

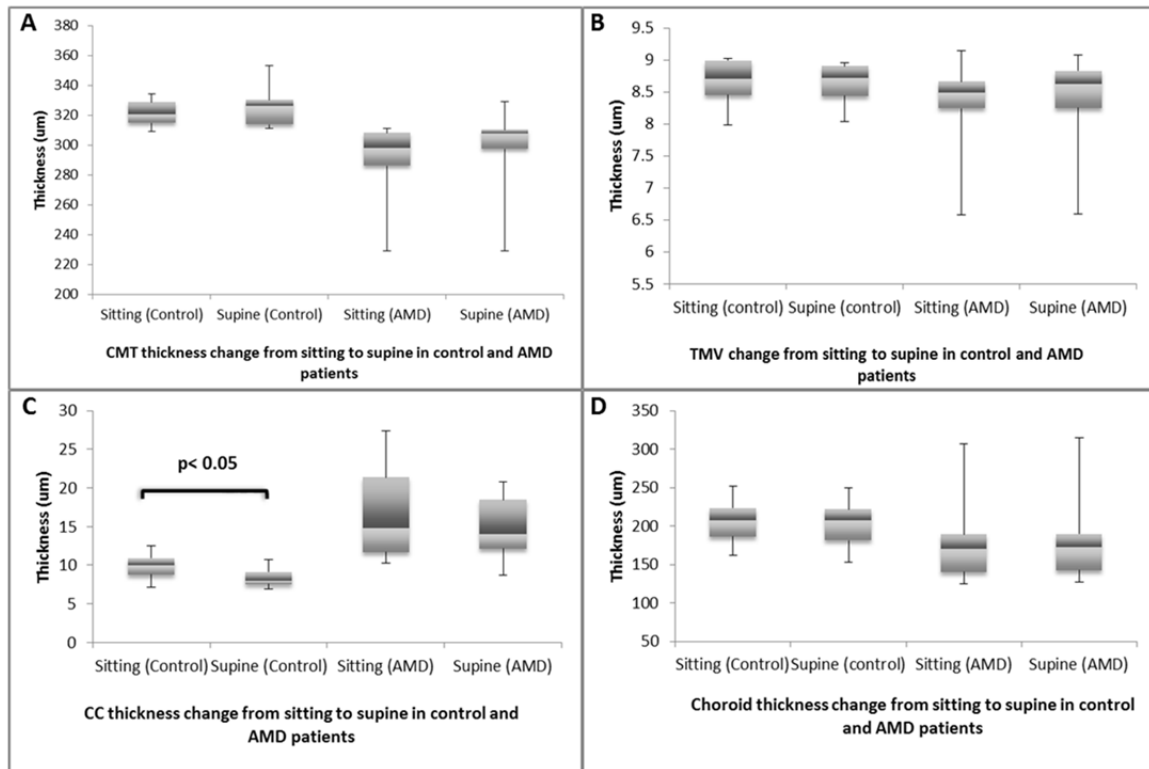

Changes in imaging for both normal and AMD subjects between supine and sitting positions. AMD, age-related macular degeneration; CMT, central macular thickness ( $\mu\text{m}$ ); TMV, total macular volume ( $\text{mm}^3$ ); CT, choroidal thickness ( $\mu\text{m}$ ); CCET, choriocapillaris equivalent thickness ( $\mu\text{m}$ ).

**eTable.** Retinal and Choroidal Baseline Optical Coherence Tomography Characteristics

| <i>Retinal Variables</i>               | <b>Normal (n=8)</b>                   | <b>AMD (n=8)</b>                      | <b>Absolute Difference</b>           | <b>p-value</b> |
|----------------------------------------|---------------------------------------|---------------------------------------|--------------------------------------|----------------|
| <b>CMT (<math>\mu\text{m}</math>)</b>  | 321 $\pm$ 9 (309-334)                 | 290 $\pm$ 26.9 (229-311)              | <b>31 <math>\mu\text{m}</math></b>   | <b>0.008</b>   |
| <b>TMV (<math>\text{mm}^3</math>)</b>  | 8.64 $\pm$ 0.4 (7.98-9.02)            | 8.32 $\pm$ 0.77 (6.58-9.15)           | 0.32 $\text{mm}^3$                   | 0.40           |
| <i>Choroidal Variables</i>             |                                       |                                       |                                      |                |
| <b>CT (<math>\mu\text{m}</math>)</b>   | 205.97 $\pm$ 28.74<br>(161.75-251.38) | 180.38 $\pm$ 58.76<br>(124.28-306.78) | 25.59 $\mu\text{m}$                  | 0.38           |
| <b>CCET (<math>\mu\text{m}</math>)</b> | 9.89 $\pm$ 1.69 (7.15-12.5)           | 16.73 $\pm$ 6.26<br>(10.31-27.38)     | <b>6.84 <math>\mu\text{m}</math></b> | <b>0.02</b>    |

Retinal and choroidal baseline optical coherence tomography characteristics for normal volunteers and patients with intermediate dry age-related macular degeneration (AMD) in the normal sitting upright position. Values are listed as mean  $\pm$  standard deviation (range).

*CMT = central macular thickness; TMV = total macular volume; CT = choroidal thickness; CCET = choriocapillaris equivalent thickness;  $\mu\text{m}$  = micrometers;  $\text{mm}^3$  = millimeters cubed.*
